# Supplementary material for: Weakened negative effect of Au/TiO2 photocatalytic activity by CdS quantum dots deposited under UV-vis light illumination at different intensity ratios
Source: Royal Society of Chemistry journal article supplement (doi:10.1039/c6cp05739j), 2016-01-01

### Supporting Information

1. SEM images of (a)  $\text{TiO}_2$ , (b)  $\text{Au-TiO}_2$ , (c)  $\text{CdS-Au-TiO}_2$ . (d) TEM images of a single  $\text{CdS-Au-TiO}_2$  nanorod. Scale bars: (a) (b) (c) 200nm

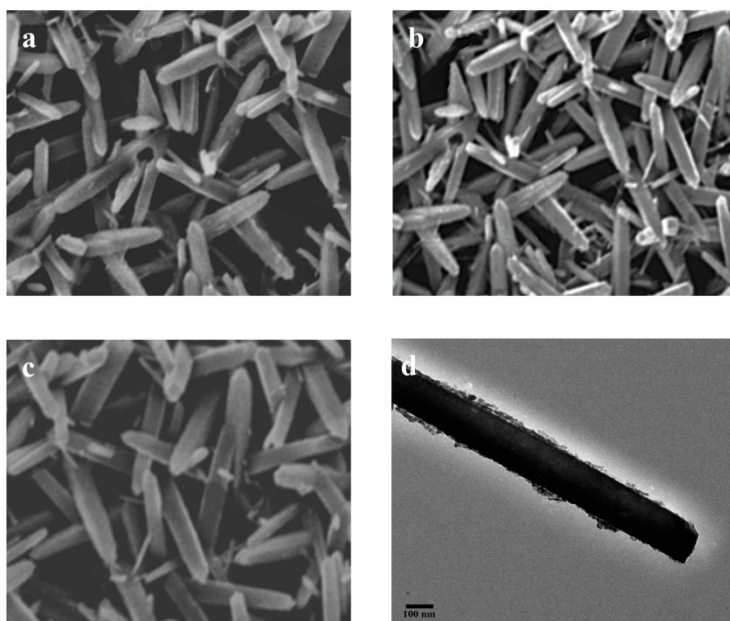

2. (a) the SEM image and the EDX-SEM mapping of  $\text{CdS/Au/TiO}_2$ , corresponding to panel S2a), (b) EDS profile of  $\text{CdS/Au/TiO}_2$ .

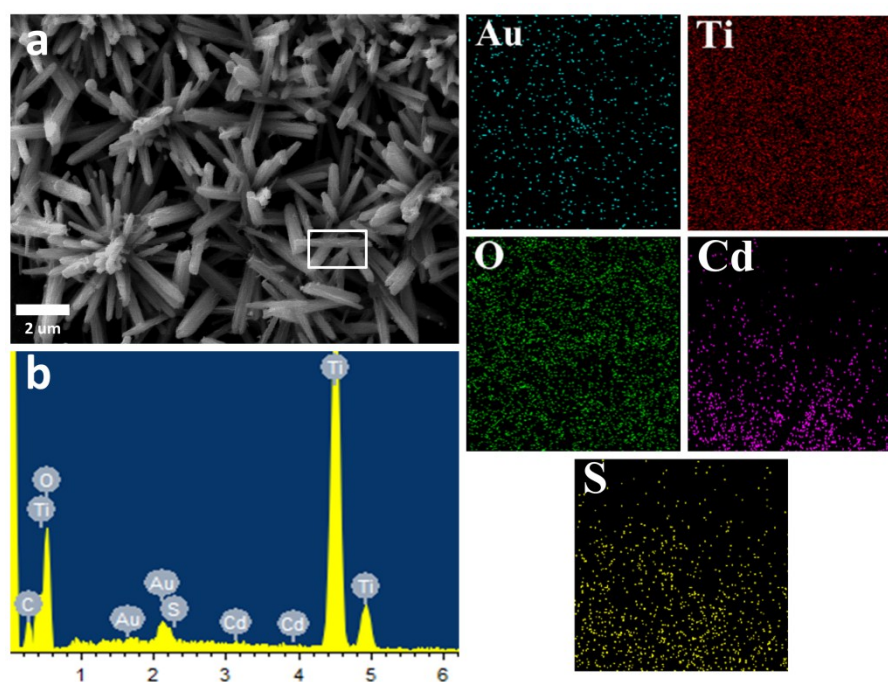

3. The minimum, in approximation, can be expressed by equations. As flows:

Au/TiO<sub>2</sub>:

$$\frac{d\Delta C}{dr} = 0.1285r^4 - 1.6724r^3 + 7.1904r^2 - 10.7658r + 3.1693$$

CdS/Au/TiO<sub>2</sub>:

$$\frac{d\Delta C}{dr} = -0.055r^4 + 0.956r^3 - 6.2061r^2 + 17.6508r - 17.329$$

Where  $\Delta C$  is the D-value of concentration of the MB ( $\Delta C = C_0 - C'$ ,  $C_0$ : initial concentration;  $C'$ : termination concentration), and  $r$  is the intensity ratio of visible to UV light.

4. Schematic illustration of the charge transfer in UV-vis light irradiated Au/TiO<sub>2</sub>

photocatalysis systems

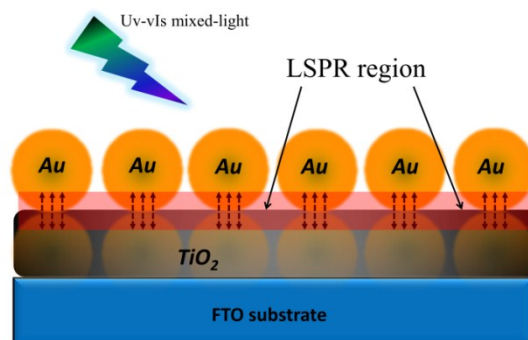

Supplement: c6cp05739j1.pdf [file c6cp05739j1.pdf]
